# Supplementary material
Source: Springer Nature journal article supplement (https://www.springermedizin.de/resource/supplementary/12943_2012_1021_MOESM3_ESM.pdf/9552150)

# KDM1A inhibitors

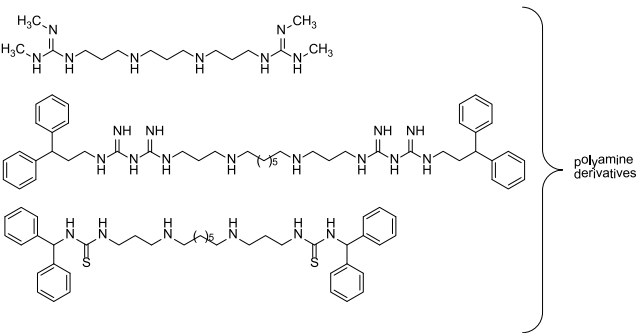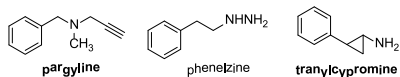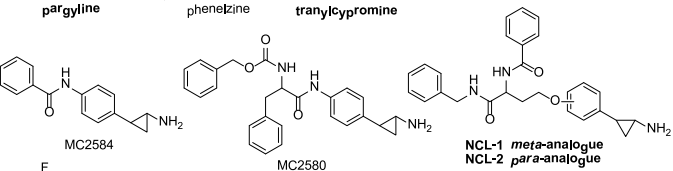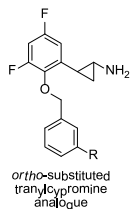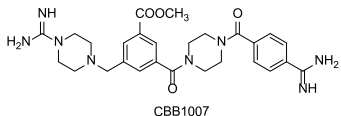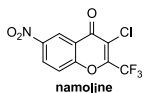

# KDM4 inhibitors

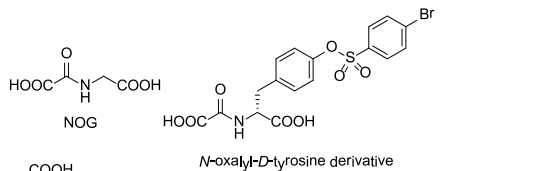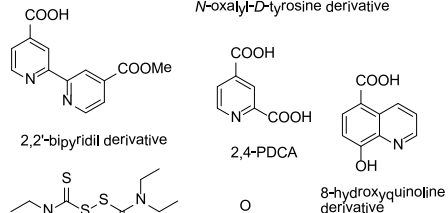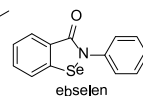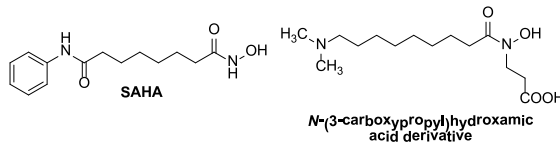

Supplement: MOESM3 [file 9552150]
